# Supplementary material for: Development of an Inactivated Camelpox Vaccine from Attenuated Camelpox Virus Strain: Safety and Protection in Camels
Source: MDPI journal article supplement (doi:10.3390/ani13091513), 2023-04-30
Supplement: s1 [file s1]

In order to determine the antibody titer, the highest dilution of the serum that inhibits the development of viral cytopathic effect (CPE) in no less than 50% of infected cell cultures is considered. A scheme of the neutralization reaction and titration of virus-neutralizing antibodies (using a constant virus dose of 100 TCID<sub>50</sub>) is presented in Table 1. In the given example, the antibody titer is 1:8. The obtained titer (the highest dilution of serum that neutralized the virus in 50% of cell cultures) can be converted from its numerical value to a logarithmic value of 2 using Table 2. Thus, a titer of 1:8 would be equivalent to 3.0 log<sub>2</sub>.

Table S1. The titration of virus-neutralizing antibodies (with a constant virus dose of 100 TCID<sub>50</sub>)

|                                         | Serum dilution |     |     |      |      |      |       | Controls                               |                  |      |
|-----------------------------------------|----------------|-----|-----|------|------|------|-------|----------------------------------------|------------------|------|
|                                         | 1:2            | 1:4 | 1:8 | 1:16 | 1:32 | 1:64 | 1:128 | Virus (100 TCID <sub>50</sub> ) + DMEM | Serum 1:2 + DMEM | DMEM |
| Serum + virus (100 TCID <sub>50</sub> ) | -              | -   | -   | +    | +    | +    | +     | +                                      | -                | -    |
|                                         | -              | -   | -   | +    | +    | +    | +     | +                                      | -                | -    |
|                                         | -              | -   | +   | +    | +    | +    | +     | +                                      | -                | -    |
|                                         | -              | -   | +   | +    | +    | +    | +     | +                                      | -                | -    |
| (-) – negative CPE; (+) – positive CPE. |                |     |     |      |      |      |       |                                        |                  |      |

Table S2. The dilution degree at 1:2 multiplicity in logarithms with bases 2 and 10 is described by Syurin, V.N. in "Guidelines for veterinary virology" (Moscow, Kolos Publishers, 1966, p. 687).

| Dilution   | Inverse numeric values | Logarithm  |         |
|------------|------------------------|------------|---------|
|            |                        | base 2     | base 10 |
| 1:2        | 2,0                    | 1,0        | 0,3010  |
| 1:4        | 4,0                    | 2,0        | 0,6021  |
| <b>1:8</b> | <b>8,0</b>             | <b>3,0</b> | 0,9031  |
| 1:16       | 16,0                   | 4,0        | 1,2041  |
| 1:32       | 32,0                   | 5,0        | 1,5051  |
| 1:64       | 64,0                   | 6,0        | 1,8062  |
| 1:128      | 128,0                  | 7,0        | 2,1072  |
| 1:256      | 256,0                  | 8,0        | 2,4082  |
| 1:512      | 512,0                  | 9,0        | 2,7093  |
| 1:1024     | 1024,0                 | 10,0       | 3,0103  |
| 1:2048     | 2048,0                 | 11,0       | 3,3113  |
